# Supplementary material
Source: publisher figshare collection journal article supplement (https://gsapubs.figshare.com/ndownloader/files/22740212)
Supplement: Supplementary file 1 [file 22740212]

GSA Data Repository Item # 9003

**Title of article** Depositional setting and regional relationships of  
basinal assemblages: Pershing Ridge Group and Fencemaker Canyon Sequence  
in northwestern Nevada

**Author(s)** John S. Oldow, Richard L. Bartel & Arthur W. Gelber

see Bulletin v. 102, p. 193 - 222

## Contents

Tables 2 & 3 (2 pg.)      Plates (12 pg.)

Table 2. Distribution of Sedimentary Facies

|                             | Hollywood Fm.<br>HMS | Antelope Springs Fm.<br>HMS    RSS | Lori Fm.<br>HMS    PMS | Packard Wash Fm.<br>PMS | TOTALS | TOTALS% |
|-----------------------------|----------------------|------------------------------------|------------------------|-------------------------|--------|---------|
| <b>Carbonate Facies</b>     |                      |                                    |                        |                         |        |         |
| cBb                         | 0                    | 0    0                             | 0    0                 | 2                       | 2      | 0.6%    |
| cBp                         | 0                    | 0    0                             | 0    0                 | 1                       | 1      | 0.3%    |
| cBw                         | 0                    | 0    0                             | 0    0                 | 2                       | 2      | 0.6%    |
| cGd                         | 0                    | 9    6                             | 5    1                 | 2                       | 23     | 6.6%    |
| cGd-m                       | 0                    | 0    2                             | 0    0                 | 0                       | 2      | 0.6%    |
| cCg                         | 0                    | 0    7                             | 0    0                 | 0                       | 7      | 2.0%    |
| cCm                         | 0                    | 0    4                             | 0    0                 | 0                       | 4      | 1.1%    |
| cCh                         | 0                    | 0    3                             | 0    0                 | 0                       | 3      | 0.9%    |
| cCt                         | 0                    | 0    0                             | 0    0                 | 0                       | 0      | 0.0%    |
| cTm                         | 4                    | 22    24                           | 0    0                 | 14                      | 64     | 18.3%   |
| cTh                         | 0                    | 2    8                             | 0    0                 | 1                       | 11     | 3.2%    |
| cTr                         | 0                    | 0    1                             | 0    0                 | 1                       | 2      | 0.6%    |
| Totals                      | 4                    | 33    55                           | 5    1                 | 23                      | 121    | 34.7%   |
| <b>Siliciclastic Facies</b> |                      |                                    |                        |                         |        |         |
| sCm                         | 1                    | 0    0                             | 0    1                 | 0                       | 2      | 0.6%    |
| sCh                         | 0                    | 0    0                             | 0    1                 | 0                       | 1      | 0.3%    |
| sCt                         | 2                    | 0    0                             | 0    1                 | 0                       | 3      | 0.9%    |
| sCp                         | 2                    | 0    0                             | 0    0                 | 0                       | 2      | 0.6%    |
| sTm                         | 10                   | 0    1                             | 4    19                | 9                       | 43     | 12.3%   |
| sTh                         | 5                    | 0    0                             | 2    14                | 8                       | 29     | 8.3%    |
| sTr                         | 3                    | 0    0                             | 1    13                | 8                       | 25     | 7.2%    |
| sPz                         | 0                    | 0    0                             | 0    0                 | 5                       | 5      | 1.4%    |
| sMz                         | 0                    | 0    0                             | 0    0                 | 10                      | 10     | 2.9%    |
| sMc                         | 17                   | 12    24                           | 7    29                | 15                      | 104    | 29.8%   |
| Totals                      | 40                   | 12    25                           | 14    78               | 55                      | 224    | 64.2%   |
| <b>Feldspathic Facies</b>   |                      |                                    |                        |                         |        |         |
| fGg                         | 4                    | 0    0                             | 0    0                 | 0                       | 4      | 1.1%    |
| Totals                      | 4                    | 0    0                             | 0    0                 | 0                       | 4      | 1.1%    |
| GRAND TOTALS                | 48                   | 45    80                           | 19    79               | 78                      | 349    | 100.0%  |

Table 3. Distribution of Sedimentary Facies Transitions

## Total Facies Transitions

| Facies | cB | cG | cC | cT | sC | sT | sP | sM  | fG | Totals |
|--------|----|----|----|----|----|----|----|-----|----|--------|
| cB     | 2  | 0  | 0  | 0  | 0  | 0  | 0  | 1   | 0  | 3      |
| cG     | 1  | 2  | 1  | 14 | 2  | 2  | 0  | 12  | 0  | 34     |
| cC     | 0  | 1  | 5  | 5  | 0  | 0  | 0  | 6   | 0  | 17     |
| cT     | 0  | 14 | 6  | 41 | 1  | 6  | 2  | 36  | 0  | 106    |
| sC     | 0  | 0  | 0  | 1  | 0  | 2  | 0  | 2   | 0  | 5      |
| sT     | 0  | 2  | 1  | 3  | 1  | 19 | 4  | 33  | 2  | 65     |
| sP     | 0  | 0  | 0  | 1  | 0  | 4  | 1  | 2   | 0  | 8      |
| sM     | 0  | 15 | 6  | 30 | 2  | 32 | 3  | 55  | 4  | 147    |
| fG     | 0  | 0  | 0  | 0  | 0  | 1  | 0  | 3   | 1  | 5      |
| Totals | 3  | 34 | 19 | 95 | 6  | 66 | 10 | 150 | 7  | 390    |

## Symmetric Facies Transitions

| Facies | cB | cG | cC | cT | sC | sT | sP | sM  | fG | Totals |
|--------|----|----|----|----|----|----|----|-----|----|--------|
| cB     | 2  | 0  | 0  | 0  | 0  | 0  | 0  | 0   | 0  | 2      |
| cG     | 0  | 2  | 1  | 14 | 0  | 2  | 0  | 12  | 0  | 31     |
| cC     | 0  | 1  | 5  | 5  | 0  | 0  | 0  | 6   | 0  | 17     |
| cT     | 0  | 14 | 5  | 41 | 1  | 3  | 1  | 30  | 0  | 95     |
| sC     | 0  | 0  | 0  | 1  | 0  | 1  | 0  | 2   | 0  | 4      |
| sT     | 0  | 2  | 0  | 3  | 1  | 19 | 4  | 32  | 1  | 62     |
| sP     | 0  | 0  | 0  | 1  | 0  | 4  | 1  | 2   | 0  | 8      |
| sM     | 0  | 12 | 6  | 30 | 2  | 32 | 2  | 55  | 3  | 142    |
| fG     | 0  | 0  | 0  | 0  | 0  | 1  | 0  | 3   | 1  | 5      |
| Totals | 2  | 31 | 17 | 95 | 4  | 62 | 8  | 142 | 5  | 366    |

## Anti-Symmetric Facies Transitions

| Facies | cB | cG | cC | cT | sC | sT | sP | sM | fG | TOTALS |
|--------|----|----|----|----|----|----|----|----|----|--------|
| cB     | 0  | 0  | 0  | 0  | 0  | 0  | 0  | 1  | 0  | 1      |
| cG     | 1  | 0  | 0  | 0  | 2  | 0  | 0  | 0  | 0  | 3      |
| cC     | 0  | 0  | 0  | 0  | 0  | 0  | 0  | 0  | 0  | 0      |
| cT     | 0  | 0  | 1  | 0  | 0  | 3  | 1  | 6  | 0  | 11     |
| sC     | 0  | 0  | 0  | 0  | 0  | 1  | 0  | 0  | 0  | 1      |
| sT     | 0  | 0  | 1  | 0  | 0  | 0  | 0  | 1  | 1  | 3      |
| sP     | 0  | 0  | 0  | 0  | 0  | 0  | 0  | 0  | 0  | 0      |
| sM     | 0  | 3  | 0  | 0  | 0  | 0  | 1  | 0  | 1  | 5      |
| fG     | 0  | 0  | 0  | 0  | 0  | 0  | 0  | 0  | 0  | 0      |
| Totals | 1  | 3  | 2  | 0  | 2  | 4  | 2  | 8  | 2  | 24     |

# HOLLYWOOD FORMATION - Hollywood Mine Section

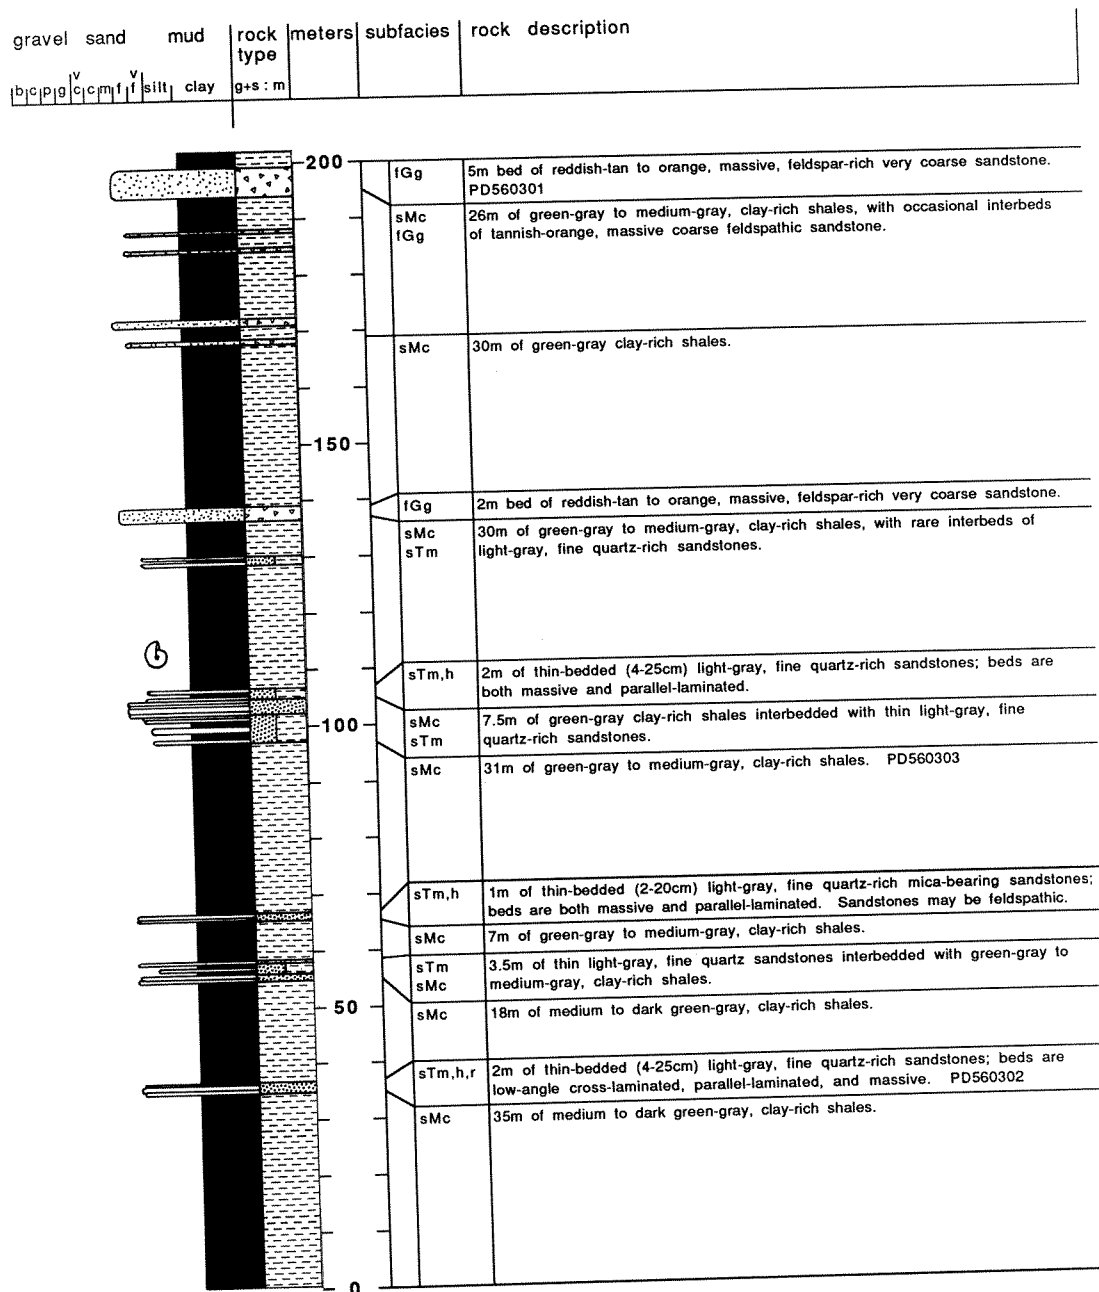

PLATE 1 (A-1)

# HOLLYWOOD FORMATION - Hollywood Mine Section

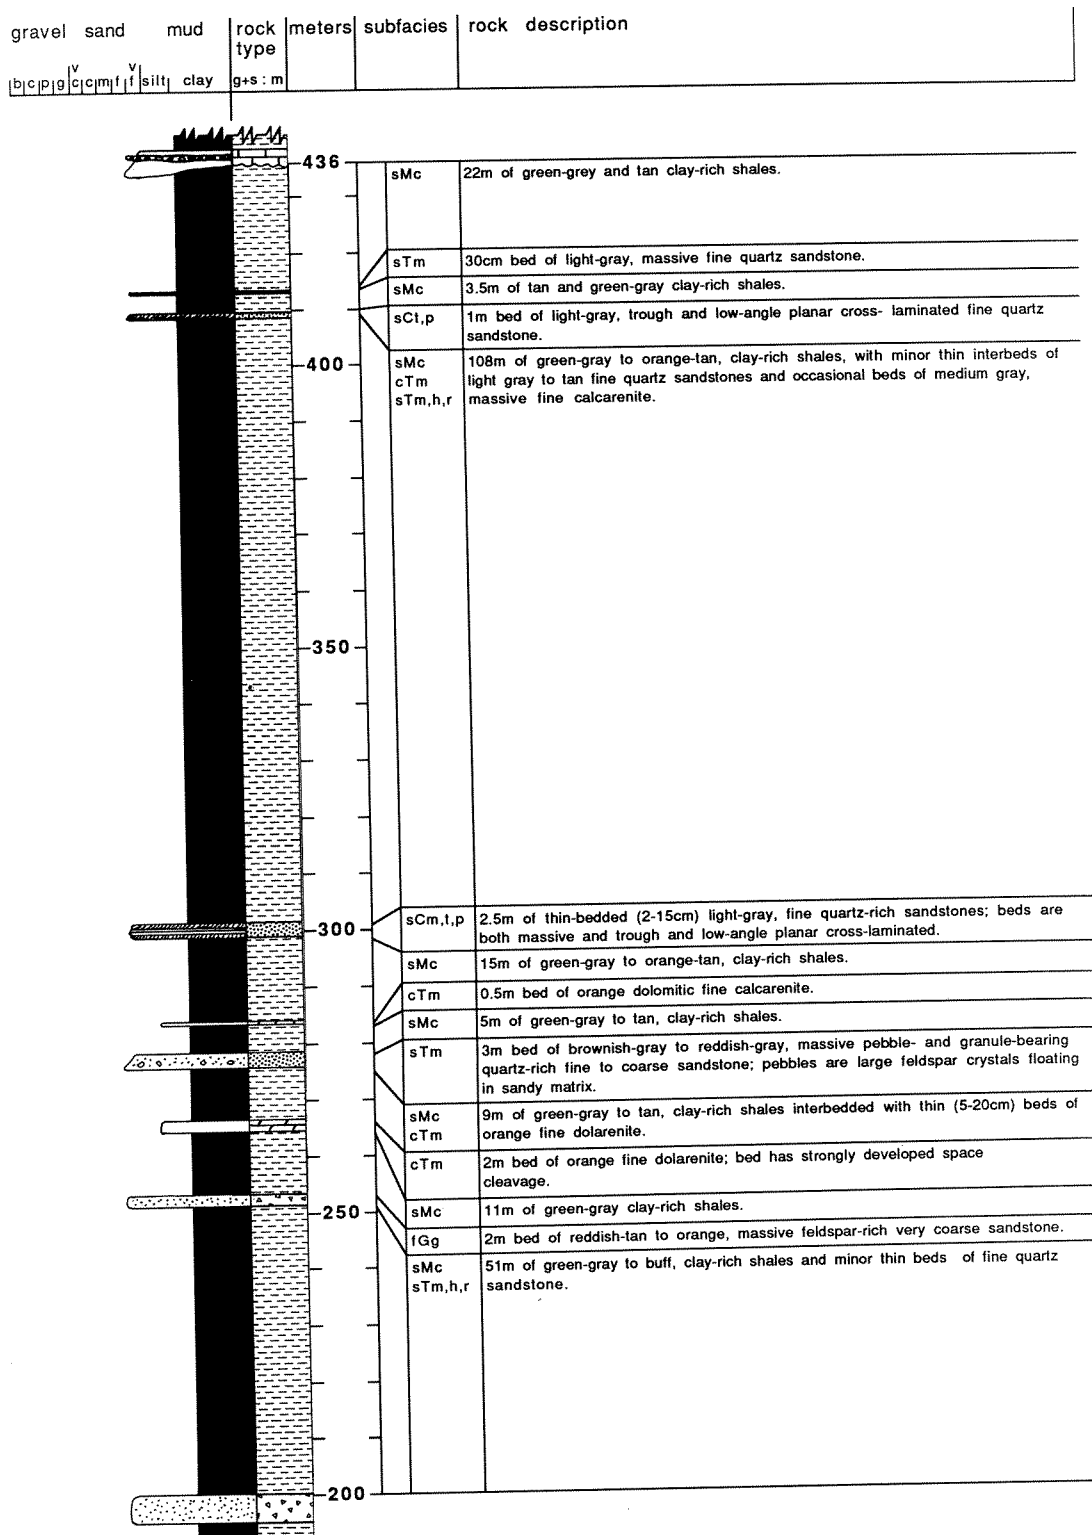

PLATE 1 (A-2)

# ANTELOPE SPRINGS FORMATION - Hollywood Mine Section

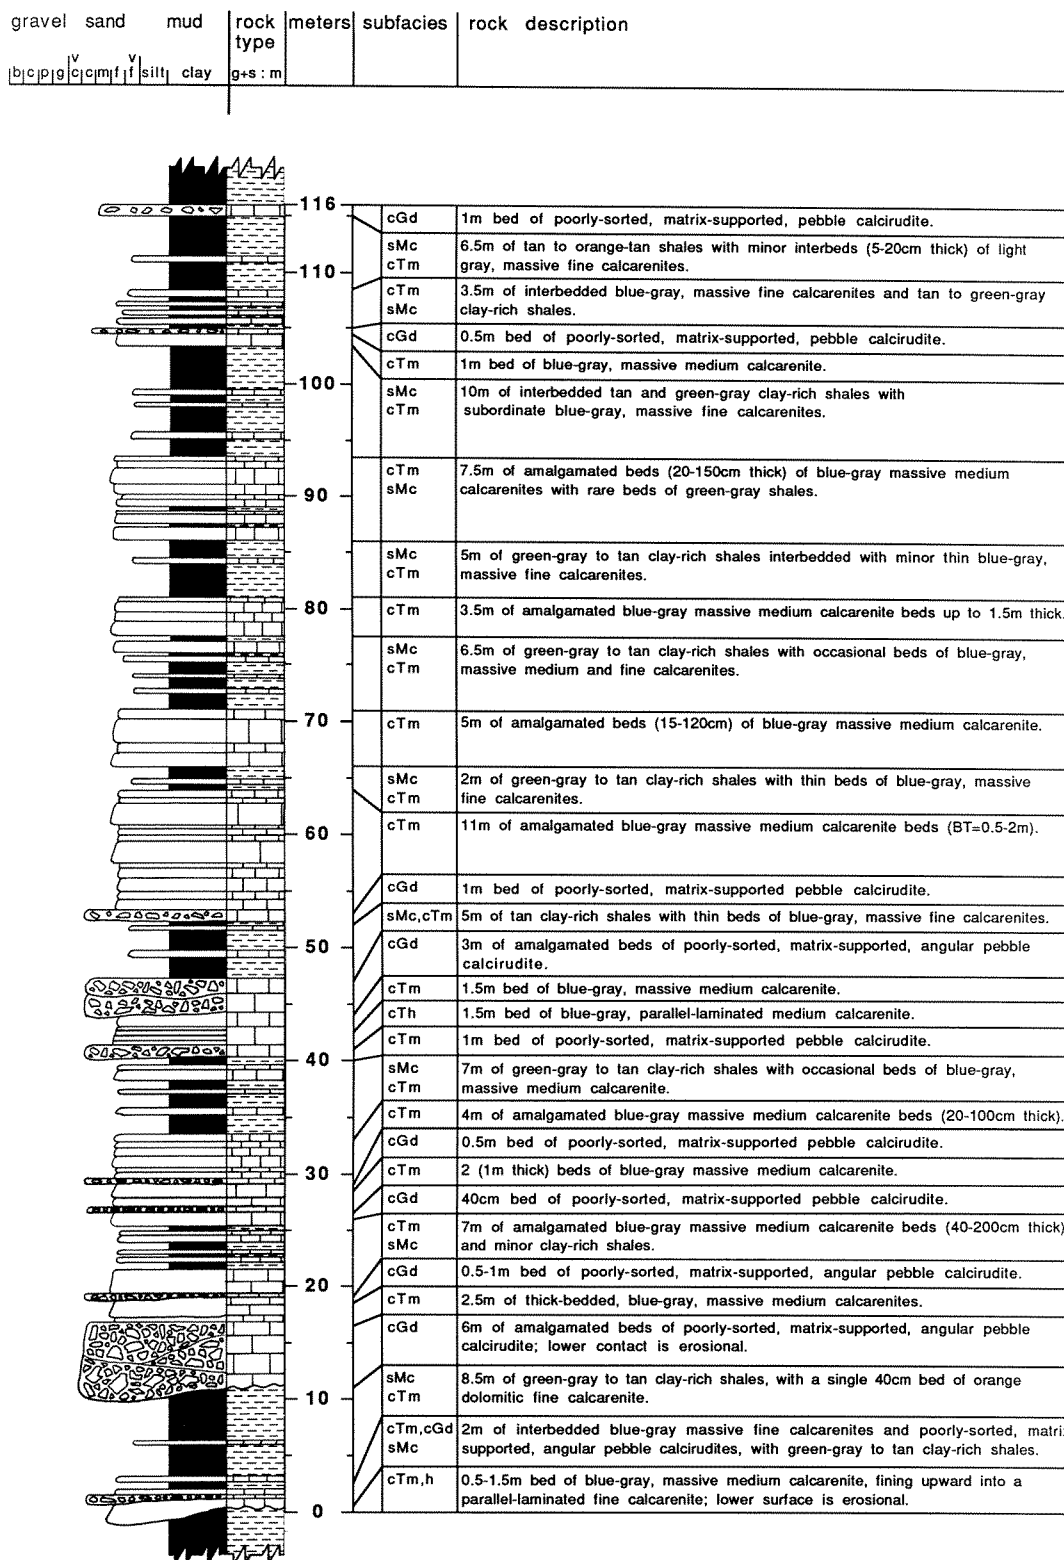

PLATE 1 (B)

# LORI FORMATION (Lower portion) - Hollywood Mine Section

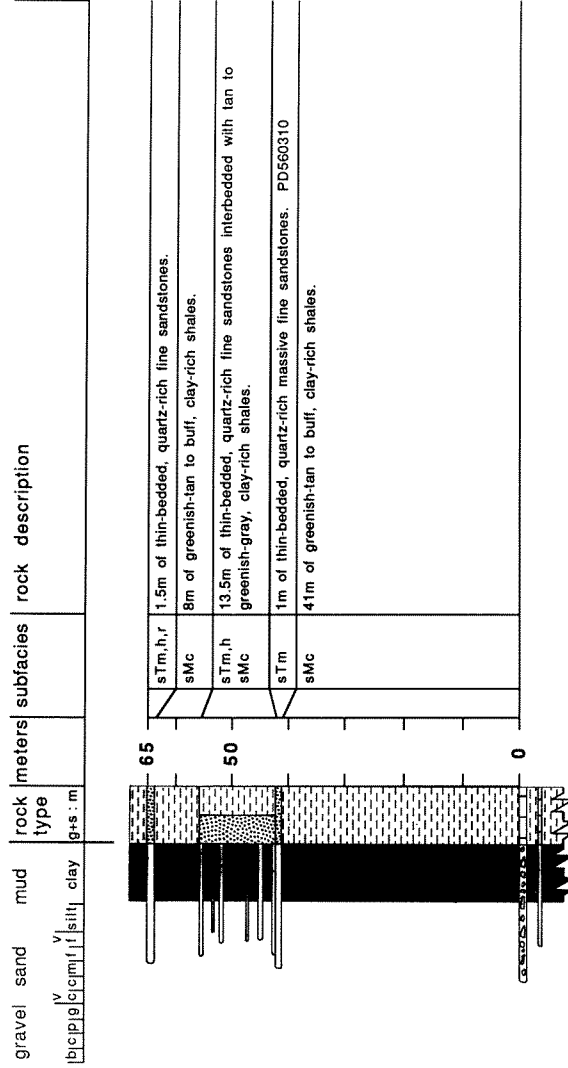

PLATE 1 (C-1)

R  
1-4

# LORI FORMATION (Lower portion) - Hollywood Mine Section

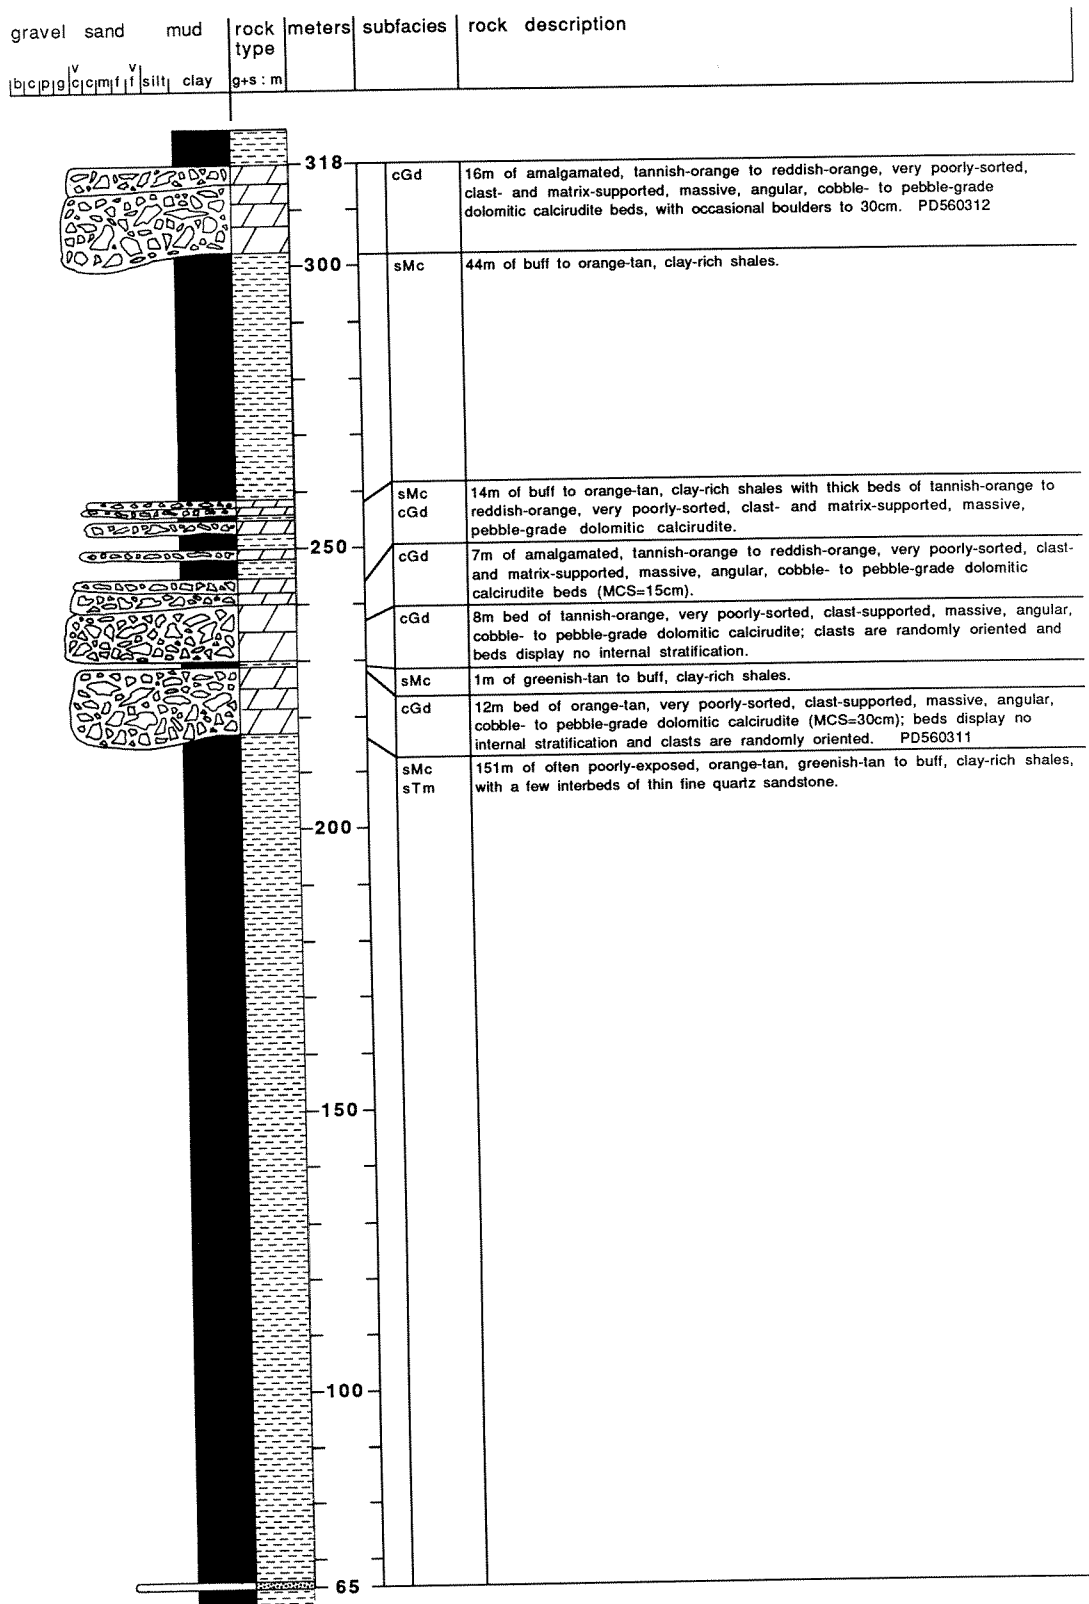



LORI FORMATION (Upper portion) - Pershing Mine Section

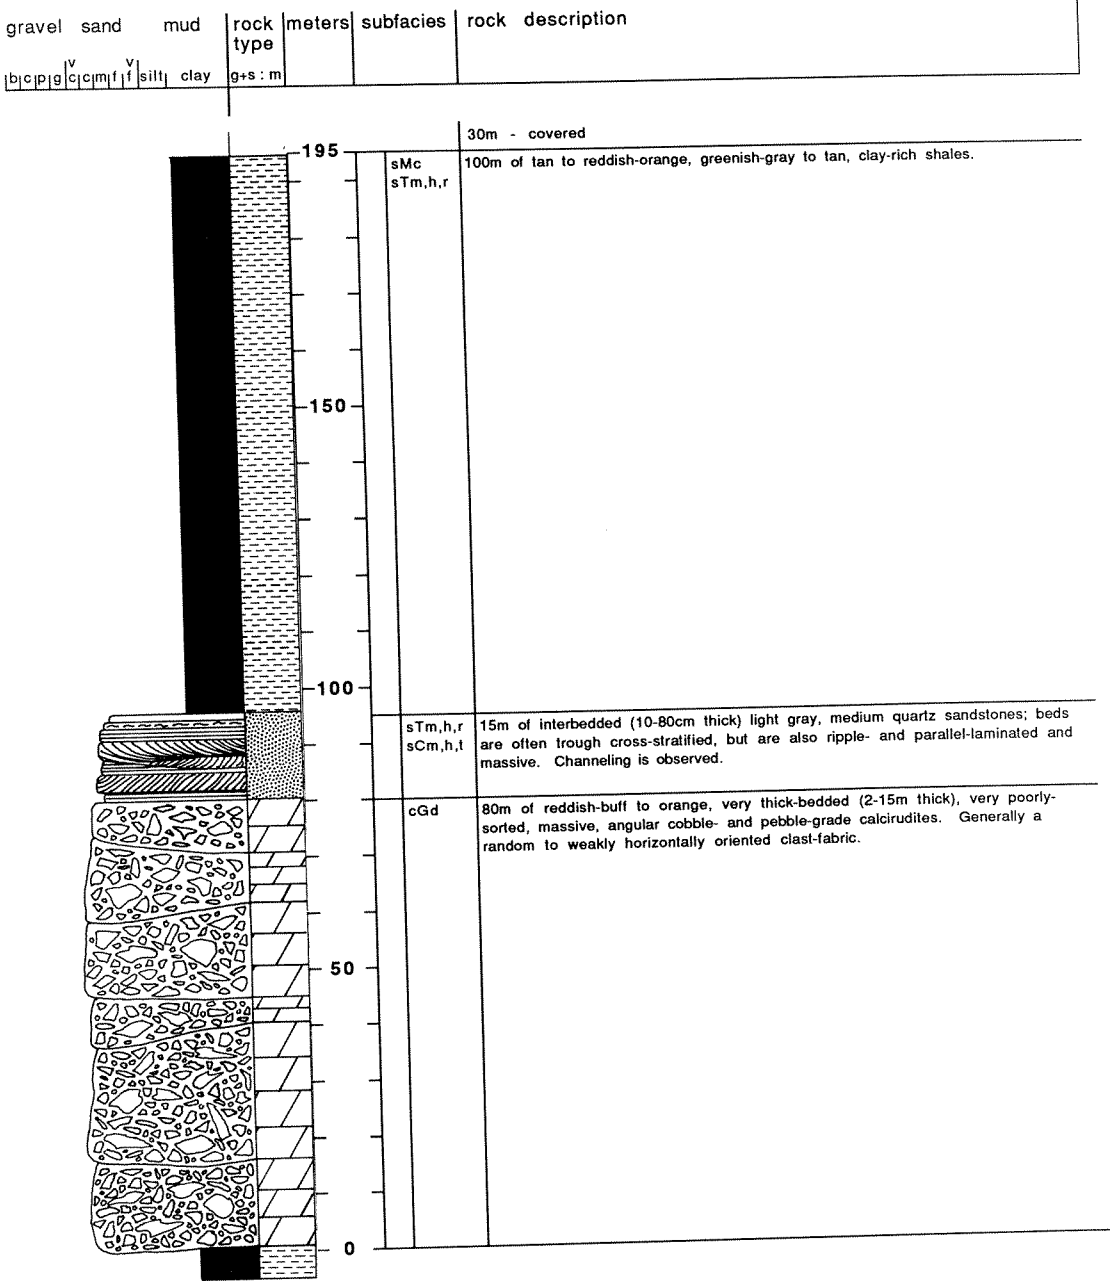

PLATE 1 (D-1)

# LORI FORMATION (Upper portion) - Pershing Mine Section

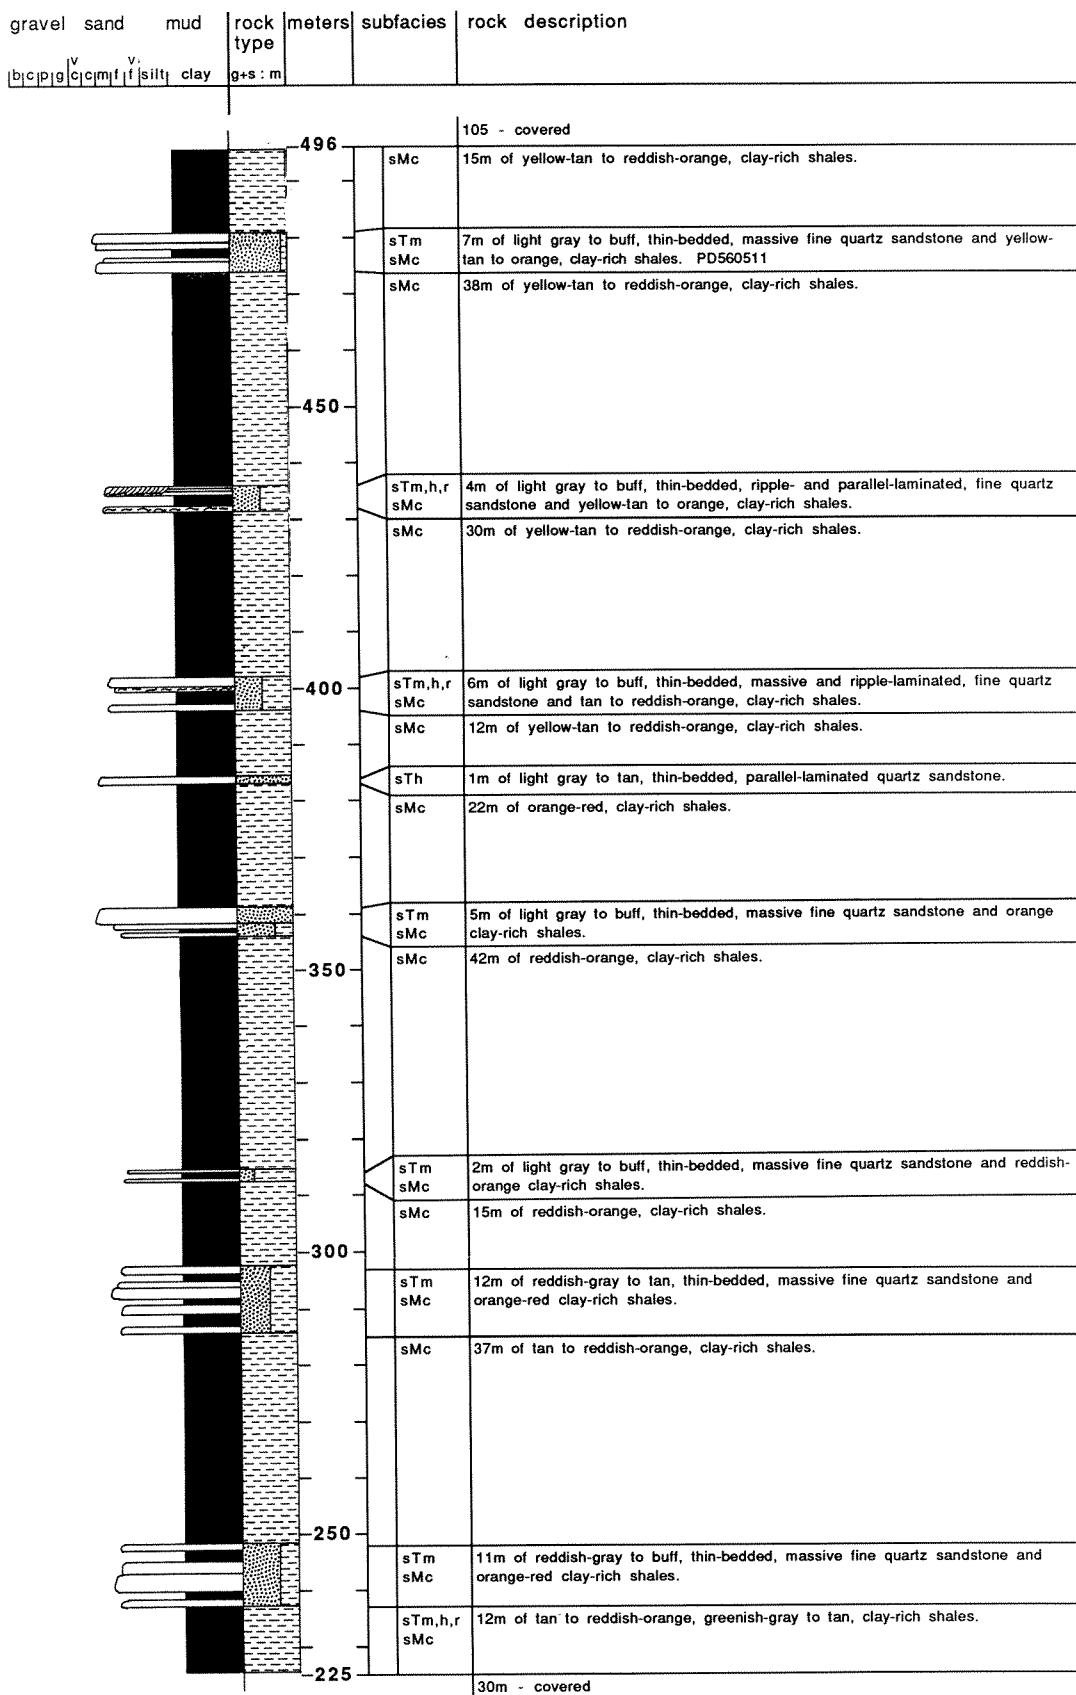

# LORI FORMATION (Upper portion) - Pershing Mine Section

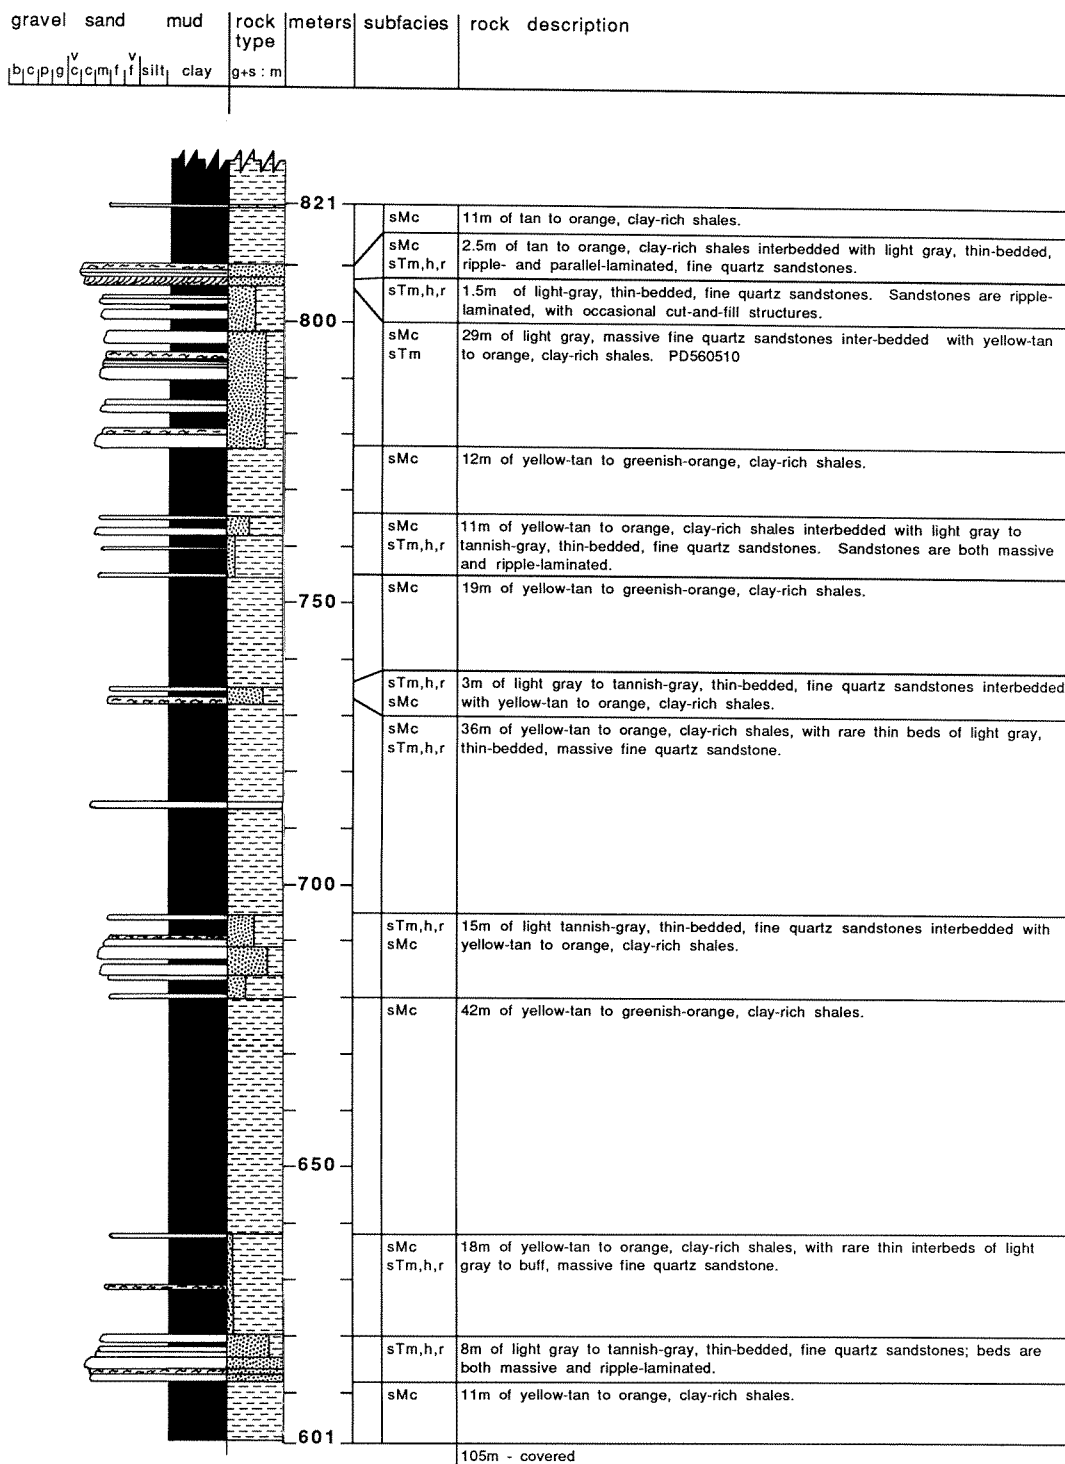

PLATE 1 (D-3)

PACKARD WASH FORMATION (Lower portion) - Pershing Mine Section

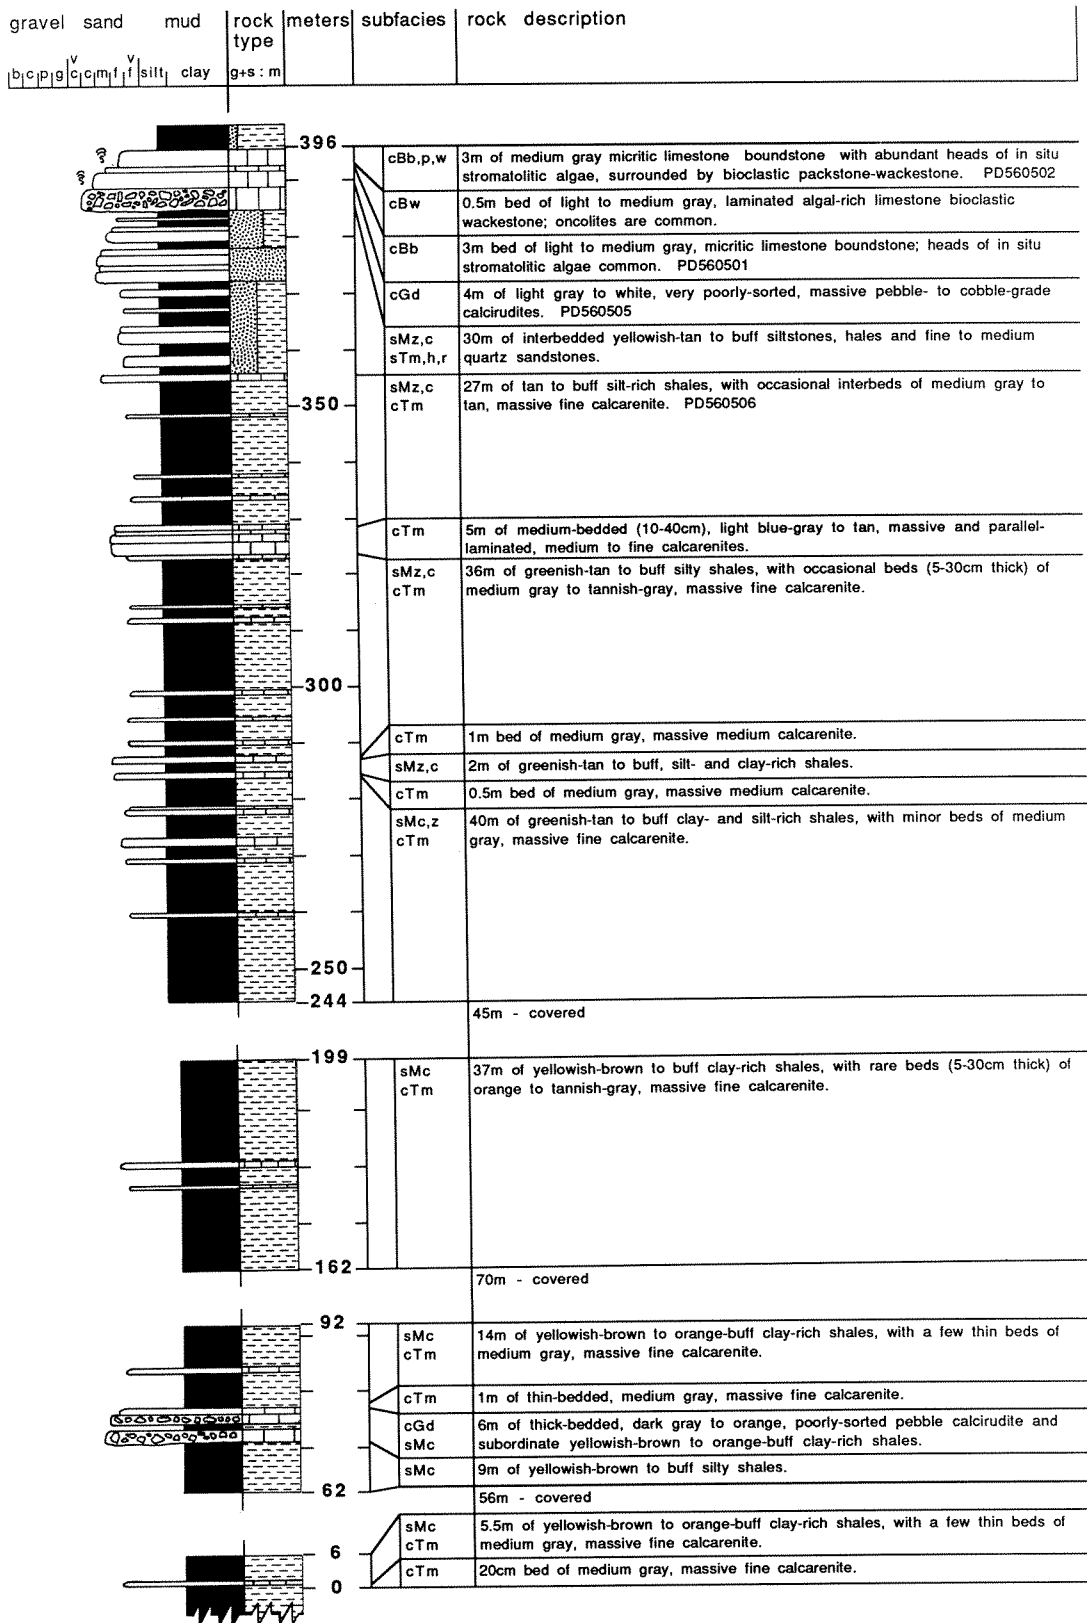

# PACKARD WASH FORMATION (Upper Portion) - Pershing Mine Section

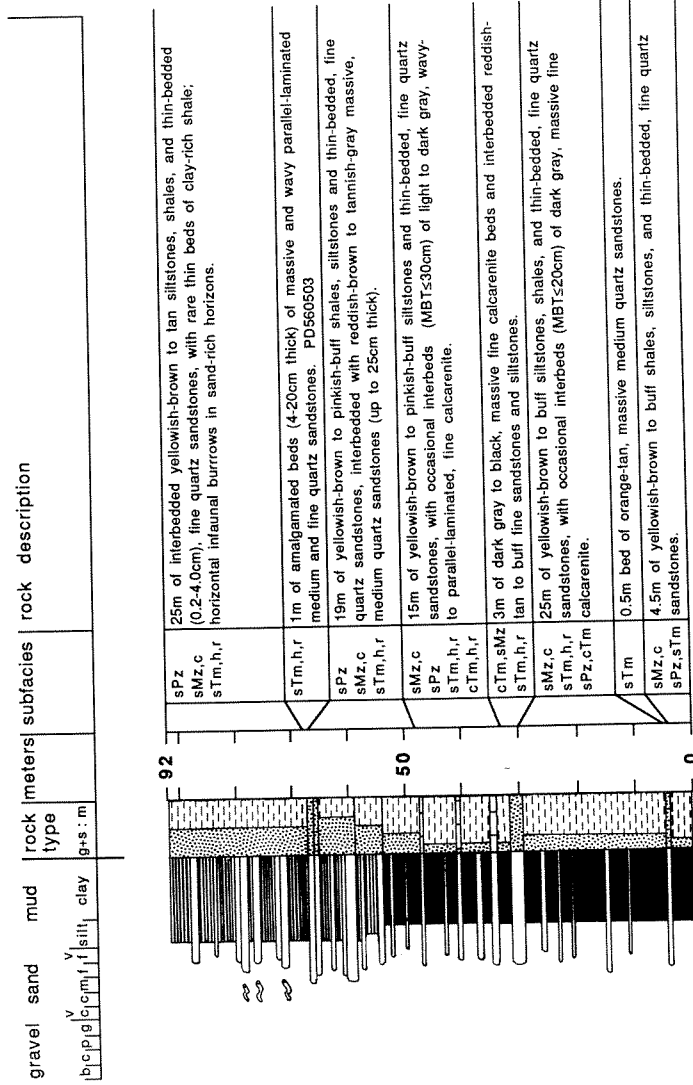

PLATE 1 (E-2)

R  
1-10

# ANTELOPE SPRINGS FORMATION - Rosetta Stone Section

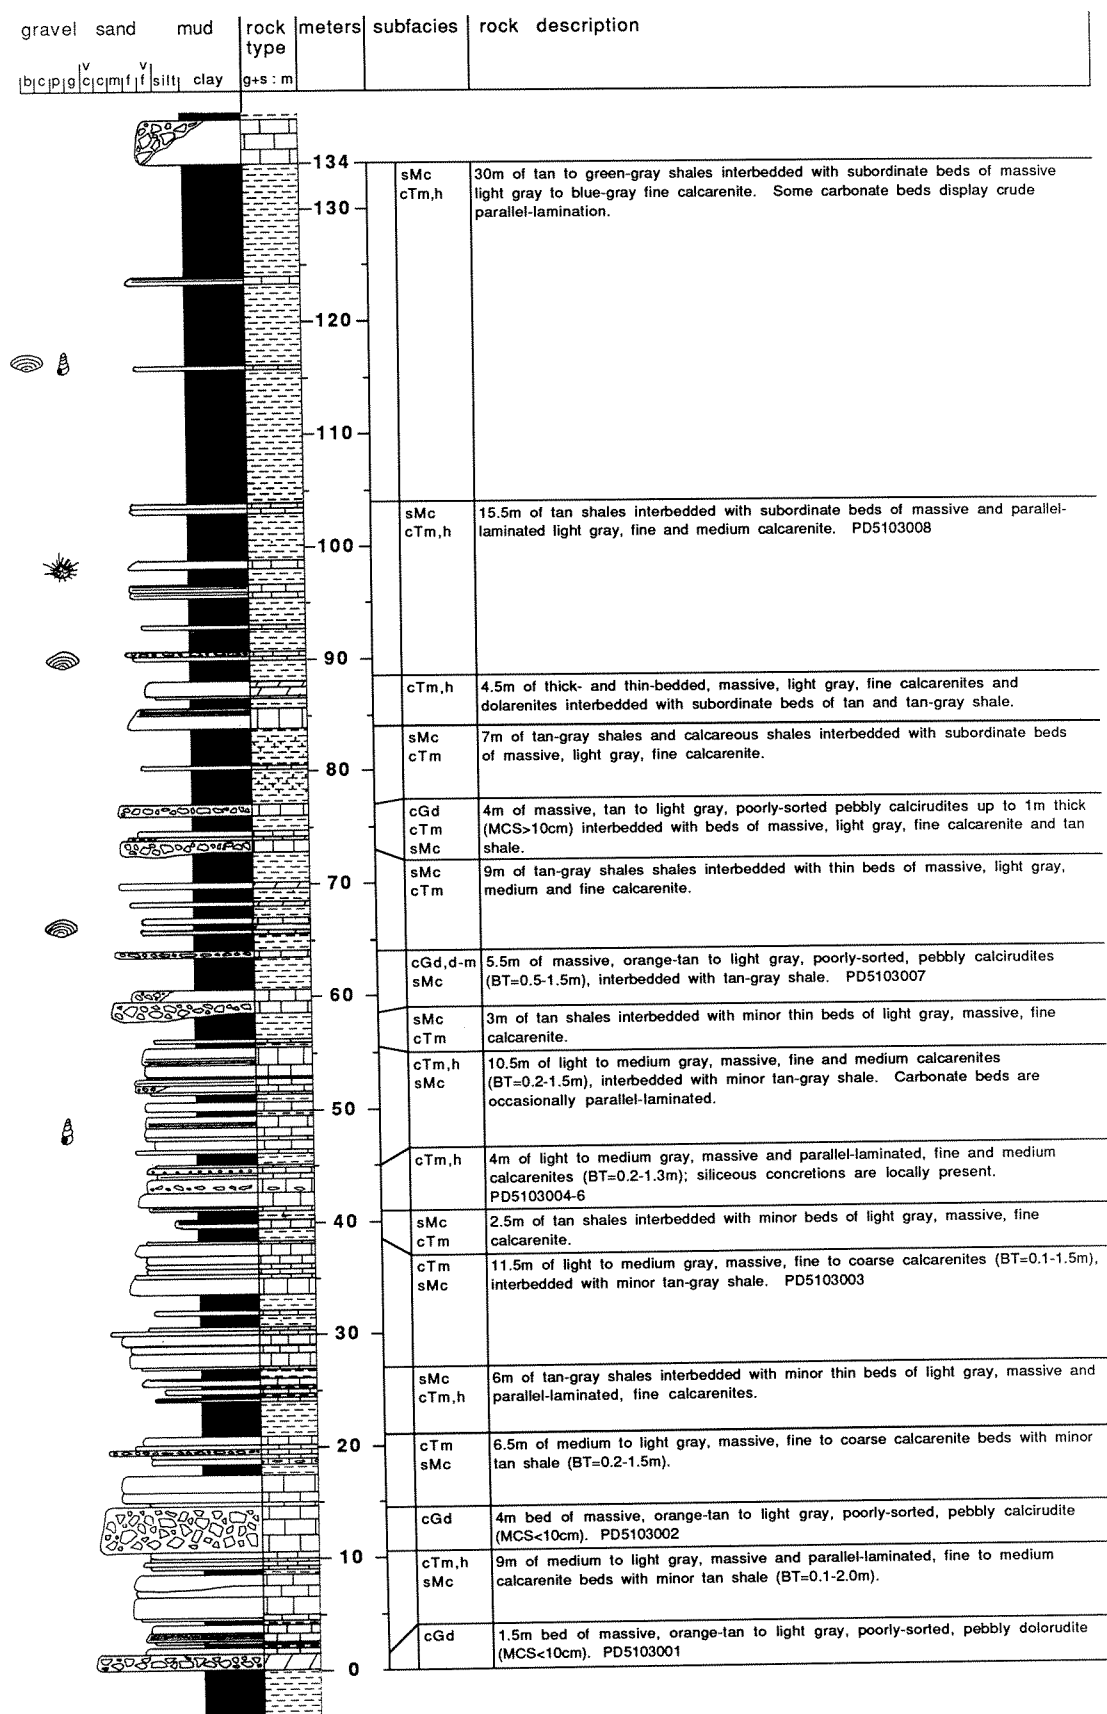

PLATE 1 (F-1)

# ANTELOPE SPRINGS FORMATION - Rosetta Stone Section

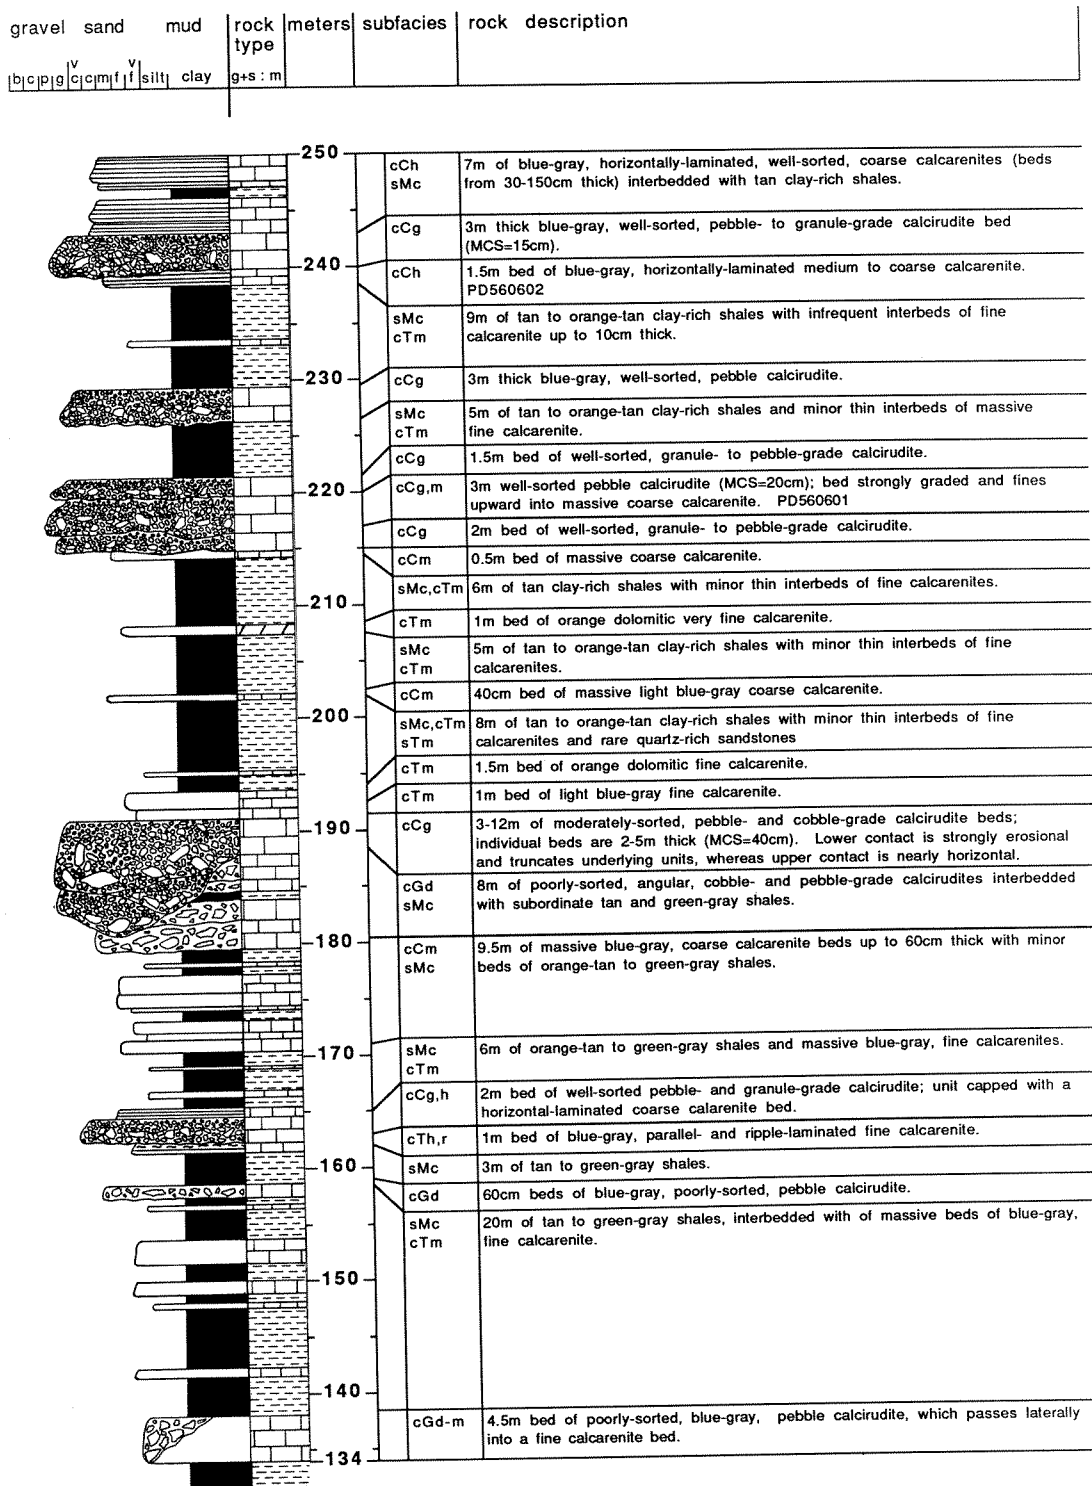

PLATE 1 (F-2)
